# Supplementary material for: Validation and modification of existing bleeding complications prediction models for percutaneous renal biopsy: a prospective study
Source: PeerJ. 2024 Dec 18;12:e18741. doi: 10.7717/peerj.18741 (PMC11663403; doi:10.7717/peerj.18741)
Supplement: Supplemental Information 1 [file peerj-12-18741-s001.xlsx]

## Sheet: peerj original data
NO	age	BMI	Platelets	Hemoglobin	Maximum size of the kidney	Immediate ultrasound information	bleeding complication	Types of bleeding	Systolic BP	Diastolic BP	Creatinine	Number of passes, median	Diabetes Mellitus	Hypertension	Hematoma size at 6 hours	Autologous kidney
1	37	27.76	163	197	12.6	1	1	1	124	83	72	2	0	1	1.1	1
2	55	28.04	111	95	13	0	1	1	140	94	58	2	0	1	2.75	1
3	49	24.62	77	175	10	0	0	0	104	76	678	2	0	0	0	1
4	51	25.81	133	275	9.8	0	0	0	127	89	68	2	0	1	0	1
5	57	26.29	71	177	10.9	1	1	1	140	90	973	4	1	1	2.1	1
6	55	20.76	166	117	11.1	1	1	1	115	84	80	2	1	1	2.4	1
7	35	20.66	143	156	9.6	0	1	1	107	68	156	2	0	1	5.94	1
8	32	28.41	137	208	9.8	0	1	1	122	84	94	3	0	0	0	1
9	46	25.63	226	137	10.7	0	1	1	122	70	88	2	0	1	0	1
10	33	17.63	279	151	9.8	0	1	1	124	98	70	2	0	1	1.93	1
11	32	28.69	299	155	11.9	0	0	0	132	91	106	2	1	0	0	1
12	38	25.91	240	137	11	0	0	0	115	82	121	2	0	1	0	1
13	63	24.44	262	129	10.9	0	0	0	123	88	176	2	0	1	0	1
14	66	20.24	244	145	10.1	0	0	0	148	87	70	2	0	1	0	1
15	27	19.68	285	123	10.6	0	1	1	124	80	85	2	0	0	3.3	1
16	47	24.22	155	154	10.3	0	0	0	132	84	96	2	0	0	0	1
17	50	23.51	262	110	11.4	0	1	1	133	86	81	2	0	0	2.59	1
18	35	16.98	196	89	9.4	0	1	1	110	83	393	3	0	0	2.8	1
19	54	24.03	475	81	12.5	0	1	1	146	98	758	2	0	1	2.5	1
20	34	28.2	295	136	9.5	1	1	2	124	91	271	2	0	1	11	1
21	49	24.14	364	97	9.6	0	1	1	109	80	262	2	0	1	1.79	1
22	29	20.44	343	137	10.7	0	1	1	103	68	57	2	0	0	0	1
23	53	23.42	323	129	10.5	0	1	1	110	74	52	2	0	0	0	1
24	34	29.74	94	245	11.5	0	0	0	130	101	80	2	0	1	0	1
25	25	19.53	307	83	11.5	0	1	1	97	64	55	2	0	0	2.45	1
26	61	20.2	207	146	9.7	0	1	1	133	86	207	2	0	1	4.72	1
27	35	28.4	223	136	10.8	0	0	0	133	92	55	2	0	0	0	1
28	20	22.96	274	186	10.3	0	1	1	125	84	78	2	0	0	0	1
29	56	24.24	209	130	10.3	0	1	1	133	74	68	2	0	0	5.47	1
30	35	28.34	273	123	9.5	0	1	1	136	102	295	3	0	1	0.68	1
31	57	19.53	71	88	12	0	1	1	138	91	142	2	0	0	7.54	1
32	50	25.22	213	118	10.8	0	0	0	112	78	83	2	0	1	0	1
33	54	20.83	347	97	10.3	0	1	1	134	80	94	2	0	0	2.73	1
34	28	27.99	189	96	10	0	0	0	97	60	47	2	0	0	0	1
35	34	28.69	311	149	10	0	1	1	129	79	70	2	0	0	4.67	1
36	38	23.44	207	128	9.7	0	0	0	103	67	47	2	0	0	0	1
37	49	25.63	243	138	11.2	0	1	1	102	68	379	3	0	0	1.56	1
38	38	22.86	259	145	10.1	0	1	1	109	81	111	2	0	1	2.01	1
39	56	22.48	346	80	12.7	0	0	0	132	73	432	2	0	0	0	1
40	33	22.68	272	133	10.8	0	0	0	110	91	102	3	0	1	0	1
41	35	27.55	285	141	9	0	1	1	115	76	226	3	0	0	1.99	1
42	60	24.34	143	126	10	0	0	0	117	97	156	2	0	0	0	1
43	40	21.63	253	128	10.2	0	1	1	136	107	140	2	0	0	4.52	1
44	39	24.22	313	61	14	0	0	0	115	71	477	2	0	0	0	1
45	36	26.93	256	117	10.2	0	1	1	131	99	136	2	0	1	0	1
46	31	20.81	252	145	10.4	1	1	1	79	52	82	2	0	0	3.4	1
47	28	19.82	223	115	9	0	1	1	103	65	109	2	0	0	0	1
48	44	27.77	212	139	10.4	0	0	0	165	93	118	2	1	1	0	1
49	36	23.44	145	178	10	0	0	0	140	106	153	2	0	1	0	1
50	28	23.44	183	131	9.9	1	1	1	120	91	123	2	0	0	4.53	1
51	23	22.03	176	120	10.5	0	0	0	119	89	55	3	0	0	0	1
52	18	26.3	285	70	11.5	0	1	1	112	94	185	2	0	1	0	1
53	49	28.62	221	129	9.6	1	1	1	118	74	91	2	0	0	4.41	1
54	19	17.72	289	116	9.5	1	1	1	105	74	125	2	0	0	3.68	1
55	26	31.74	270	162	11.3	0	0	0	102	73	77	2	0	0	0	1
56	18	24.45	299	139	11.8	0	0	0	128	90	49	2	0	0	0	1
57	27	20.72	262	164	11	1	1	1	138	87	80	2	0	0	5.18	1
58	55	21.23	568	73	11.7	1	1	1	113	68	112	2	0	0	3.58	1
59	25	25.32	432	121	10.3	0	0	0	137	96	67	2	0	0	0	1
60	51	23.83	117	80	11	0	1	1	176	96	254	2	1	1	3.4	1
61	60	25.39	319	147	10.9	0	0	0	151	104	87	3	0	1	0	1
62	18	24.22	364	165	9.8	0	0	0	130	106	91	2	0	0	0	1
63	53	21.97	249	100	10.8	0	0	0	151	94	125	2	0	0	0	1
64	53	24.98	243	161	10	0	1	1	149	99	121	2	0	1	0	1
65	42	26.67	221	173	10.4	1	1	1	122	89	119	2	0	1	4.15	1
66	49	23.39	281	150	14.7	0	0	0	118	99	70	2	0	1	0	1
67	32	23.66	166	133	10.7	0	1	1	124	78	122	2	0	0	2.21	1
68	33	26.37	185	160	9.9	0	0	0	127	86	113	3	0	0	0	1
69	59	21.76	148	123	9	0	1	1	138	97	136	2	0	1	3	1
70	55	22.6	105	156	13.2	0	0	0	129	74	72	2	1	1	0	1
71	39	25.81	279	82	12.5	0	1	1	147	79	83	3	0	1	3.77	1
72	27	27.14	269	119	12	0	1	1	138	70	61	3	0	1	0	1
73	51	29.07	119	166	10.5	0	0	0	128	94	110	2	1	1	0	1
74	28	18.37	162	117	9.4	0	1	1	132	93	116	2	0	1	2.71	1
75	55	24.22	147	140	11.1	1	1	1	142	108	144	4	0	1	4.46	1
76	44	25.35	205	159	9.5	1	1	1	124	88	146	2	0	1	3.21	1
77	47	19.92	203	137	10.1	0	0	0	98	72	44	2	0	0	0	1
78	37	29.41	252	146	11.1	0	0	0	104	62	97	2	0	1	0	1
79	51	22.21	185	169	10	1	1	1	127	87	77	2	1	0	4.14	1
80	61	22.06	259	108	10	1	1	1	147	91	157	2	0	0	4.16	1
81	18	24.05	375	165	11.5	1	1	1	143	99	78	1	0	0	0	1
82	38	27.22	243	133	11.2	0	0	0	143	98	94	2	1	1	0	1
83	23	23.89	189	146	10.9	1	1	1	94	55	59	2	0	0	0	1
84	59	28.32	130	190	11.3	0	0	0	124	82	71	2	0	1	0	1
85	62	26.82	374	108	11.5	0	0	0	136	83	585	3	0	0	0	1
86	42	22.88	84	83	11.3	0	1	1	110	70	113	2	0	0	0	1
87	58	24.61	333	139	10	0	0	0	124	89	64	2	1	1	0	1
88	71	24.74	263	86	12	0	1	1	149	97	151	2	0	0	0	1
89	35	24.34	286	165	11.1	0	0	0	107	64	105	2	0	1	0	1
90	48	25.69	119	101	9.2	0	1	1	140	97	175	2	0	1	3.95	1
91	52	23.67	171	157	11.5	0	0	0	102	65	81	2	0	1	0	1
92	20	22.77	325	131	9.5	1	1	1	117	75	77	2	0	0	6.92	1
93	58	33.2	180	175	11.1	0	0	0	141	78	94	2	1	1	0	1
94	25	23.81	351	133	11.4	0	0	0	137	90	144	3	0	0	0	1
95	23	17.71	200	120	9.8	0	0	0	139	84	254	3	0	1	0	1
96	49	22.94	217	121	9.4	0	0	0	100	58	114	2	0	0	0	1
97	73	23.56	153	78	9.6	0	1	1	165	85	185	2	0	1	0	1
98	64	24.22	313	140	10.8	0	0	0	136	93	97	3	0	0	0	1
99	60	25.06	158	119	9.9	0	0	0	105	71	208	2	1	1	0	1
100	70	26.37	220	138	9.6	0	0	0	129	83	42	2	0	1	0	1
101	55	21.48	222	123	8.6	0	1	1	112	76	118	2	0	1	4.07	1
102	60	22.04	229	126	10	0	0	0	115	77	111	2	0	1	0	1
103	42	27.34	210	154	10.5	1	0	0	106	67	89	2	0	0	0	1
104	33	21.71	167	115	10	0	1	2	162	129	156	2	0	1	5.9	1
105	36	20.7	226	147	10.5	0	1	1	109	66	61	2	0	0	2.84	1
106	50	30.45	278	163	11.3	0	0	0	139	85	97	2	0	0	0	1
107	57	23.14	119	96	9.8	0	0	0	145	84	280	2	0	1	0	1
108	24	24.09	628	148	11.1	0	1	1	110	84	114	2	0	0	0	1
109	31	25.25	390	133	11.3	0	0	0	121	83	180	2	0	0	0	1
110	35	18.73	142	119	10.9	1	1	1	89	56	72	2	0	0	4.13	1
111	25	18.93	214	94	10.3	0	0	0	143	100	149	2	0	0	0	1
112	18	24.46	232	94	10.6	0	1	1	125	85	349	2	0	0	2.5	1
113	18	21.8	257	110	10	0	0	0	95	63	48	2	0	0	0	1
114	43	19.75	161	135	9.2	0	0	0	127	75	159	3	0	1	0	1
115	74	22.68	156	88	9.7	0	1	1	122	73	157	2	1	1	2.1	1
116	37	24.82	533	148	10.6	0	0	0	116	87	89	2	0	0	0	1
117	69	24.67	180	141	11.5	0	1	1	99	71	78	2	0	0	0	1
118	18	28.68	354	146	10.7	0	0	0	125	95	73	2	0	1	0	1
119	26	21.63	265	82	11.5	0	1	1	135	87	75	2	0	1	2.48	1
120	60	18.22	240	111	11.7	1	1	1	142	90	38	2	1	0	2.3	1
121	69	28.34	184	155	10.7	0	0	0	137	87	84	2	1	1	0	1
122	35	17.58	117	100	11.5	0	1	1	136	89	202	2	0	1	2.1	1
123	39	25.28	268	143	9.9	1	1	1	152	88	88	1	0	1	3.47	1
124	69	27.12	188	120	10	0	0	0	137	77	99	2	0	1	0	1
125	51	27.34	333	140	11.3	1	1	1	123	76	143	2	0	0	1.2	1
126	31	26.44	234	138	9	1	1	1	130	88	115	2	0	0	2.75	1
127	48	21.23	113	89	9.6	0	1	1	181	115	178	1	1	1	2.1	1
128	43	24.68	184	140	10.2	0	1	1	120	84	138	1	0	0	1.93	1
129	32	23.33	182	148	9.9	0	0	0	198	140	111	1	0	0	0	1
130	31	31.64	201	160	10	0	0	0	97	59	66	2	0	0	0	1
131	18	19.23	330	96	9.6	0	1	1	134	89	119	1	0	0	2.87	1
132	37	33.22	204	80	11	0	0	0	112	81	668	1	1	1	0	1
133	33	23.88	284	126	9.5	0	0	0	102	57	150	1	0	1	0	1
134	49	31.11	240	156	10	0	0	0	103	67	78	1	1	1	0	1
135	25	18.14	290	126	11.5	0	1	1	102	64	65	1	0	0	1.71	1
136	37	22.58	189	147	9.6	0	0	0	123	89	105	2	0	1	0	1
137	33	17.93	245	120	10.5	0	0	0	110	68	97	1	1	1	0	1
138	58	22.68	158	142	9.8	0	0	0	112	68	57	2	0	0	0	1
139	45	27.68	204	155	9.9	0	0	0	108	81	178	1	0	1	0	1
140	58	19.44	224	96	10.7	0	0	0	113	87	84	1	0	1	0	1
141	56	25.47	133	158	11.1	0	0	0	125	81	83	2	0	0	0	1
142	31	25.8	188	123	10.8	0	0	0	129	95	120	3	0	1	0	1
143	31	19.83	215	133	10	0	0	0	109	76	69	2	0	0	0	1
144	69	21.23	161	111	9.6	0	1	1	126	86	138	2	0	1	3.03	1
145	61	26.75	151	161	11.7	0	1	1	104	67	68	2	0	0	4.67	1
146	46	21.14	288	139	9	0	0	0	114	84	169	2	0	1	0	1
147	28	20.75	222	73	9.4	0	1	1	145	90	1859	1	0	1	3.4	1
148	33	26.35	285	145	10.9	0	1	1	136	89	125	2	0	0	3.16	1
149	37	31.22	124	75	11.1	0	1	1	129	85	229	2	0	0	2.3	1
150	25	22.94	223	127	9.9	0	1	1	121	87	63	2	0	0	2.81	1
151	27	25.86	179	118	12	0	0	0	109	79	62	2	0	0	0	1
152	46	31.14	188	130	11	0	0	0	120	77	95	2	0	1	0	1
153	31	25.24	169	137	9.5	1	1	2	107	69	68	2	0	0	4.86	1
154	37	19.23	225	125	9.4	0	0	0	105	73	94	2	0	0	0	1
155	60	22.49	209	144	11	0	1	1	126	81	77	2	0	0	2.99	1
156	65	28.28	276	155	11.7	0	0	0	134	83	110	2	1	1	0	1
157	43	23.23	213	118	10.3	0	0	0	104	56	66	3	0	0	0	1
158	45	27.68	384	194	9.9	0	0	0	128	85	76	2	0	1	0	1
159	37	22.14	209	117	9.8	1	1	1	120	75	135	2	0	0	2.38	1
160	51	25.81	273	149	10.2	0	1	1	110	80	71	2	0	1	3.5	1
161	27	22.95	304	139	11.9	0	0	0	105	72	50	2	0	0	0	1
162	18	25.04	299	123	9.5	0	0	0	115	72	222	2	0	1	0	1
163	26	19.49	290	91	9.8	1	1	1	133	91	158	2	0	1	3	1
164	35	27.1	264	159	10.6	0	0	0	123	85	111	2	0	0	0	1
165	57	19.53	136	135	10.5	0	0	0	122	82	175	2	0	0	0	1
166	69	22.83	176	148	9.9	1	1	1	115	68	67	2	0	0	5.78	1
167	70	25.39	202	134	10.8	0	0	0	143	104	168	2	1	1	0	1
168	72	26.78	148	104	10.2	0	0	0	135	65	298	2	0	1	0	1
169	45	27.34	193	154	10.8	1	1	1	120	86	101	2	0	1	2.1	1
170	56	30.47	148	156	9.3	0	0	0	135	108	71	2	0	0	0	1
171	66	21.51	226	118	10.8	1	1	1	120	77	64	2	0	1	1.3	1
172	23	37.55	271	160	11.5	0	1	1	145	100	86	2	0	0	1.64	1
173	35	22.89	214	141	10.8	0	0	0	113	85	61	2	0	1	0	1
174	59	25.39	217	108	12	0	0	0	153	87	83	2	1	1	0	1
175	45	21.77	214	123	10	1	1	1	117	89	65	2	0	0	2.58	1
176	49	21.21	191	83	10.4	1	1	1	107	70	141	2	0	0	2.36	1
177	39	19.13	165	125	10.8	1	1	1	103	69	64	2	0	0	0	1
178	29	27.94	185	133	9.8	1	1	1	112	81	105	2	0	1	1.54	1
179	62	24.03	357	129	9.8	1	1	1	123	87	160	3	0	1	1.76	1
180	39	20.52	263	139	11.9	0	0	0	118	85	97	2	0	1	0	1
181	59	33.2	259	185	9.2	0	0	0	100	63	138	3	0	1	0	1
182	48	18.03	187	80	11.5	1	1	1	105	75	188	2	0	0	1.92	1
183	33	19.03	184	128	10.2	1	1	1	110	71	108	2	0	0	2.67	1
184	31	27.24	277	134	11.4	0	1	1	112	75	86	3	0	0	1.31	1
185	34	23.83	234	124	9.4	0	0	0	127	82	101	2	0	1	0	1
186	29	20.43	170	92	10.4	0	1	1	100	76	109	2	0	0	3.59	1
187	39	30.35	152	254	12.7	0	0	0	121	86	77	2	0	0	0	1
188	28	26.91	320	128	10.1	0	0	0	117	81	65	2	0	0	0	1
189	54	24.56	206	113	9	0	0	0	110	75	108	2	0	1	0	1
190	65	25.86	262	153	11.4	0	1	1	100	76	91	2	0	1	1.07	1
191	40	28.71	125	135	9.9	0	1	1	141	94	155	2	0	1	0	1
192	50	24.86	191	121	10	0	1	1	128	85	99	2	0	1	1.4	1
193	28	19.63	173	129	11.2	1	0	0	103	64	58	2	0	0	0	1
194	49	22.27	118	113	9	1	1	1	102	68	86	2	0	1	2.4	1
195	52	29.41	244	153	9.4	1	0	0	98	69	138	2	0	1	0	1
196	51	21.23	239	115	9.6	0	1	1	117	86	117	2	0	1	1.02	1
197	35	27.55	355	143	10.3	1	1	1	102	77	129	2	0	1	1.65	1
198	31	26.67	273	159	10.8	0	0	0	130	98	117	2	0	0	0	1
199	43	26.31	195	140	10	1	1	2	125	93	131	3	0	1	0	1
200	34	19.29	236	139	10.6	1	1	1	106	67	60	2	0	0	8.3	1
201	69	30.85	177	120	10.1	0	0	0	145	85	93	2	0	1	0	1
202	34	22.31	223	109	10.6	1	1	1	98	70	65	2	0	0	1.35	1
203	70	26.67	154	115	11.5	0	0	0	116	67	266	2	0	1	0	1
204	26	25.78	315	111	11.5	0	1	1	120	83	86	1	0	0	2.3	1
205	39	25.31	245	123	9.5	1	1	1	97	68	184	2	0	1	2.3	1
206	31	22.04	246	146	9.8	1	1	1	143	96	112	2	0	0	1.9	1
207	37	27.48	336	178	11.6	0	0	0	105	76	79	2	0	0	0	1
208	59	24.8	290	174	10.8	0	0	0	135	84	76	2	0	0	0	1
209	32	23.31	292	129	9.7	0	0	0	130	88	75	3	0	0	0	1
210	51	19.23	212	138	10.5	1	1	1	146	89	853	1	1	1	4.6	1
211	58	20.76	177	123	9.7	0	1	1	116	86	84	2	0	0	2.1	1
212	50	25.51	118	155	9.6	1	1	1	128	89	152	2	0	1	1.8	1
213	38	21.45	155	136	8.5	0	0	0	100	63	127	2	0	0	0	1
214	34	25.63	198	127	9.8	0	0	0	97	61	64	2	0	0	0	1
215	25	21.26	268	111	9.3	0	1	1	112	64	60	2	0	0	2.1	1
216	30	22.39	208	150	10.2	0	0	0	102	76	133	2	0	0	0	1
217	28	33.95	209	143	10.8	1	1	1	128	80	336	2	0	1	2.5	1
218	41	24.8	211	161	10.5	0	0	0	146	94	127	2	0	1	0	1
219	44	26.01	237	137	8.6	0	0	0	139	89	174	3	0	0	0	1
220	33	24.02	142	141	10.4	1	1	1	138	96	129	2	0	1	3.29	1
221	69	25.65	200	121	9.5	0	0	0	123	78	177	2	1	1	0	1
222	57	22.04	190	102	11.7	0	1	1	131	69	116	3	1	1	2.1	1
223	68	31.14	193	133	10.6	0	0	0	131	71	77	2	0	1	0	1
224	36	16.42	156	116	10.6	0	1	1	97	64	79	2	0	1	2.39	1
225	24	17.07	216	115	10.3	0	1	1	111	77	56	2	0	0	5	1
226	47	26.99	189	155	10.3	0	0	0	131	88	153	3	0	1	0	1
227	35	30.27	253	122	11.1	0	0	0	128	86	85	2	0	1	0	1
228	53	23.63	221	122	10.3	1	1	1	126	77	92	2	0	1	2.3	1
229	25	29.07	220	151	10	1	1	1	111	76	71	2	0	0	2.34	1
230	39	26.49	215	152	9.9	0	0	0	125	89	97	2	0	1	0	1
231	27	19.47	240	105	9.3	1	1	1	111	77	114	2	0	0	2.2	1
232	38	28.58	279	130	12.3	0	0	0	131	90	245	2	0	1	0	1
233	47	21.57	295	124	10	0	0	0	103	68	80	2	0	0	0	1
234	47	28.13	182	73	10.3	0	1	1	116	82	160	2	0	0	2.2	1
235	34	24.65	325	115	9.3	0	1	1	107	70	74	2	0	0	1.36	1
236	59	24.77	186	125	9	0	0	0	122	67	112	4	0	0	0	1
237	34	20.96	304	145	10.2	1	1	1	112	74	69	3	0	0	2.2	1
238	30	21.6	228	141	10.3	1	1	1	111	86	121	2	0	0	4.16	1
239	30	21.7	249	138	11.2	0	0	0	118	73	50	2	0	0	0	1
240	54	22.67	236	90	9	0	1	1	137	96	162	2	0	1	3.76	1
241	48	29.05	285	154	9.6	0	0	0	104	80	104	2	0	1	0	1
242	23	18.36	178	145	8.3	0	0	0	120	80	151	2	0	1	0	1
243	28	28.73	269	129	9.9	0	0	0	116	75	131	2	0	0	0	1
244	34	23.8	351	163	10.9	0	0	0	119	85	98	4	0	0	0	1
245	23	27.97	416	119	12.1	0	0	0	132	88	80	2	0	0	0	1
246	40	30.04	194	132	10.4	0	0	0	102	74	76	2	0	0	0	1
247	40	25.01	228	132	10.5	0	0	0	122	88	126	2	0	0	0	1
248	18	18.67	93	90	11.8	0	1	1	117	74	260	2	0	1	2.75	1
249	50	33.6	166	186	12.8	0	0	0	165	116	98	3	0	1	0	1
250	67	22.21	252	103	9.6	1	1	1	130	86	251	2	1	1	2.9	1
251	42	24.41	91	120	10	0	1	1	122	84	140	2	0	1	1.38	1
252	22	18.69	177	124	11.2	1	1	1	117	80	67	3	0	0	0.94	1
253	20	22.31	254	136	10.9	1	1	1	123	83	81	2	0	0	1.83	1
254	49	24.77	218	124	10	0	0	0	132	79	76	2	0	1	0	1
255	51	27.47	165	85	9.8	0	0	0	112	77	219	3	0	1	0	1
256	36	18.78	101	116	10.1	1	1	1	103	68	107	2	0	0	1.7	1
257	35	28.25	202	114	10.8	1	1	1	128	81	174	2	0	0	2	1
258	65	23.59	248	141	9.9	0	0	0	128	89	79	2	1	1	0	1
259	42	21.64	151	113	9.2	0	0	0	104	63	89	2	0	0	0	1
260	22	27.7	384	156	10.4	0	0	0	130	74	93	2	0	0	0	1
261	24	23.15	182	136	10.8	0	1	1	113	79	77	2	0	0	0	1
262	58	23.73	280	146	10.8	1	1	1	115	80	132	2	0	0	3.09	1
263	53	26.56	399	119	10.9	0	0	0	135	79	461	2	0	1	0	1
264	38	22.77	197	195	9.7	0	0	0	116	82	74	2	0	0	0	1
265	59	20.44	184	113	10.8	0	1	1	138	93	125	2	0	1	0	1
266	31	26.06	208	86	10.7	0	1	1	126	90	266	2	0	1	1.16	1
267	61	24.86	206	90	9	0	1	1	165	82	418	2	0	1	1.62	1
268	37	27.46	164	133	10.2	1	1	1	133	97	416	2	0	0	4.8	1
269	50	22.03	231	125	10.2	0	0	0	119	76	51	3	0	0	0	1
270	37	22.31	222	136	9.4	1	1	1	128	90	120	2	0	1	5.2	1
271	69	18.9	318	83	9.6	1	1	1	110	69	453	2	0	0	2.8	1
272	69	25.83	206	102	10.2	0	0	0	121	77	121	2	1	0	0	1
273	27	23.67	242	139	10.6	1	1	1	100	74	98	6	0	0	4	1
274	26	19.81	180	111	10.1	0	1	1	108	81	69	2	0	0	2.59	1
275	53	24	187	101	9	1	1	1	110	82	123	2	0	1	3.7	1
276	25	24.09	236	146	10.4	1	1	1	108	87	81	2	0	0	2.2	1
277	51	26.91	196	150	9.6	0	1	1	116	84	133	2	0	1	0	1
278	18	19.44	302	100	10.3	1	1	1	102	66	64	2	0	0	6	1
279	40	27.49	219	131	9.8	0	0	0	93	62	81	2	0	0	0	1
280	67	19.53	162	80	10.2	0	1	1	122	67	78	2	1	1	5.7	1
281	38	17.78	67	93	10.9	0	1	1	129	93	37	2	0	0	2.2	1
282	19	22.86	214	86	14	1	1	1	134	92	113	2	0	0	2.7	1
283	61	25.61	154	144	11.5	0	0	0	112	76	160	2	1	1	0	1
284	53	25.97	281	107	10.3	1	1	1	139	101	83	2	0	0	4.7	1
285	31	16.61	211	122	10.7	1	1	1	110	78	69	1	0	0	3.9	1
286	50	26.35	225	116	10.5	1	0	0	122	79	83	2	0	0	0	1
287	44	31.41	297	114	11.3	0	0	0	123	86	60	2	0	1	0	1
288	36	20.69	209	122	10.3	1	1	1	101	59	62	2	0	0	5.12	1
289	53	27.06	185	149	10	0	0	0	116	80	171	1	0	0	0	1
290	49	24.65	306	128	10.7	0	0	0	123	89	74	2	0	1	0	1
291	76	28.84	246	114	11.1	0	0	0	142	63	65	1	1	1	0	1
292	30	21.64	303	146	9.2	1	1	1	120	91	127	2	0	0	4.12	1
293	66	25.95	262	143	9.7	0	0	0	140	81	101	2	1	1	0	1
294	39	21.07	360	153	10.3	1	1	1	126	69	69	2	0	1	6.9	1
295	63	25.39	204	156	8.4	0	0	0	113	78	107	2	1	1	0	1
296	41	25.04	276	141	10.2	1	1	1	111	75	91	2	0	1	2.5	1
297	61	22.66	109	103	9.7	0	1	1	124	76	228	2	0	1	4.21	1
298	20	29.41	283	180	10.3	1	1	1	125	77	115	2	0	0	1.7	1
299	55	25.95	234	102	10.4	1	1	1	101	66	219	2	0	0	5.8	1
300	31	20.2	151	118	9.2	0	1	1	109	70	209	2	0	0	2.55	1
301	35	23.03	180	141	10.4	0	1	1	118	85	111	2	0	0	5.3	1
302	68	29.74	190	162	9.4	0	1	1	135	91	202	3	0	1	4.75	1
303	78	22.66	148	148	9	0	0	0	106	69	78	2	0	0	0	1
304	73	28.13	146	89	10.7	1	1	1	151	94	275	2	0	1	3.9	1
305	49	29.74	127	88	11.3	0	0	0	114	70	59	2	0	1	0	1
306	59	29.36	164	104	10.1	0	1	1	139	87	111	2	0	1	5.37	1
307	52	21.67	333	105	11.1	0	0	0	111	62	635	4	1	1	0	1
308	52	23.73	171	122	10	1	1	1	131	87	93	2	0	1	6.3	1
309	36	25.59	162	125	9.4	0	0	0	110	81	189	2	0	1	0	1
310	38	18.88	230	148	9.8	1	1	1	119	81	125	2	0	0	4.4	1
311	65	24	292	91	8.6	0	1	1	149	74	406	2	0	0	5.4	1
312	37	23.36	258	136	10.6	1	1	1	133	86	97	1	0	1	4.73	1
313	45	22.68	177	126	10	0	1	1	106	74	144	2	0	0	4.52	1
314	32	25.51	304	145	11.8	0	0	0	109	66	73	2	0	0	0	1
315	59	27.73	143	156	11	0	0	0	109	70	140	4	0	0	0	1
316	45	23.19	129	102	9.3	0	1	1	120	82	205	3	0	0	3.35	1
317	34	26.81	225	138	10.3	1	1	1	119	95	172	2	0	0	3	1
318	16	28.67	304	163	11.1	0	0	0	137	89	67	2	0	1	0	1
319	40	30	189	145	10.5	0	0	0	127	89	130	2	0	0	0	1
320	52	20.44	282	132	10.5	0	1	1	114	71	40	2	1	0	2.18	1
321	33	21.11	196	131	10.6	0	1	1	96	76	67	2	1	0	2.96	1
322	36	26.04	254	130	10.8	0	0	0	100	73	157	1	1	1	0	1
323	36	20.08	188	165	10.4	0	1	1	119	72	102	2	0	0	3.56	1
324	53	25.96	328	151	9.2	1	1	1	114	76	76	1	0	0	4.12	1
325	57	28.39	120	121	10.2	0	0	0	132	82	93	1	0	1	0	1
326	51	25.33	193	135	9.2	0	1	1	100	73	118	1	0	0	3.05	1
327	30	23.42	158	84	10.1	1	1	1	119	90	123	2	0	0	3.78	1
328	45	21.72	162	165	10.1	1	1	1	103	63	118	2	0	0	5.95	1
329	30	21.78	322	111	10.8	1	1	1	133	86	117	3	1	1	3.7	1
330	39	29.41	250	152	9.3	1	1	1	139	92	216	2	0	1	3.1	1
331	72	25.97	170	82	11	0	1	1	141	71	574	2	0	1	5.95	1
332	57	25.73	162	90	11.2	0	1	1	142	80	522	3	1	1	3.55	1
333	53	22.89	292	94	10.6	0	1	1	146	88	124	2	0	1	5.05	1
334	61	23.8	210	134	10.4	0	0	0	133	77	86	2	1	1	0	1
335	45	20.94	234	104	10.8	1	1	1	133	77	101	2	1	1	2.8	1
336	37	23.63	165	111	11.5	0	1	1	114	76	48	2	0	0	0	1
337	31	23.53	317	93	10.9	1	1	1	112	72	64	2	0	0	6.3	1
338	57	22.49	315	82	11.1	0	1	1	90	62	278	2	0	0	3.2	1
339	52	22.06	99	105	10.5	1	1	1	125	76	75	2	1	0	5.3	1
340	40	18.86	162	115	10.6	1	1	1	110	70	74	2	0	0	5.3	1
341	55	23.38	169	137	10.5	0	0	0	141	95	70	4	0	1	0	1
342	52	17.94	241	124	9.4	1	1	1	116	79	48	2	0	0	5.2	1
343	63	22.86	212	133	10.8	0	0	0	104	79	78	2	0	0	0	1
344	41	26.14	195	133	10	0	0	0	99	74	56	3	0	0	0	1
345	61	25.61	302	141	9.7	0	0	0	142	91	268	3	1	1	0	1
346	33	26.57	152	132	10	0	0	0	138	87	156	3	0	0	0	1
347	42	30.42	239	159	10.9	1	1	1	138	91	115	2	0	1	3.8	1
348	49	24.49	181	153	9.6	0	0	0	140	94	115	2	0	1	0	1
349	50	26.12	124	101	12.6	0	1	1	123	91	121	2	0	1	3.58	1
350	43	16.02	222	135	10.2	1	1	1	114	77	93	2	0	0	4.5	1
351	51	24.22	222	135	10.5	0	1	1	114	85	85	2	0	1	0	1
352	29	22.66	214	141	11.4	0	0	0	112	87	61	2	0	0	0	1
353	68	21.36	340	138	11.4	0	0	0	143	79	54	2	0	0	0	1
354	35	25.71	314	173	10.5	0	0	0	115	87	88	2	0	0	0	1
355	28	28.04	338	142	10.4	1	1	1	107	74	56	2	0	0	4.6	1
356	27	23.42	328	133	10.5	1	1	1	108	70	70	2	0	0	2.5	1
357	51	27.39	168	155	11.6	0	0	0	98	73	93	1	0	0	0	1
358	39	23.93	263	142	10.1	1	1	1	122	87	66	2	0	0	5.1	1
359	19	22.6	214	65	12.4	1	1	1	129	85	906	3	0	1	4.2	1
360	29	17.97	292	128	10.8	0	1	1	111	77	56	2	0	0	7.48	1
361	56	20.66	177	118	10	0	1	1	131	84	170	2	0	1	3.45	1
362	38	24.02	209	133	11	0	1	1	110	86	61	2	0	0	4.21	1
363	54	23.18	193	109	11.5	0	1	1	118	77	105	2	0	1	5.63	1
364	39	19.03	215	150	11.2	0	0	0	122	69	67	2	0	1	0	1
365	35	22.1	174	139	11	0	1	1	105	67	57	2	0	0	3.57	1
366	29	21.48	280	147	9.5	0	1	2	126	84	135	2	0	1	4.5	1
367	31	22.49	317	125	11	0	1	1	93	52	73	2	0	1	3.84	1
368	32	17.97	228	135	10	0	1	1	122	74	86	1	0	0	4.96	1
369	27	19.63	318	102	10.7	0	1	1	105	71	51	2	0	1	6.81	1
370	39	19.49	216	130	10.1	0	0	0	119	86	135	2	0	1	0	1
371	45	22.59	146	136	10.8	0	0	0	112	79	104	2	0	0	0	1
372	31	22.04	192	175	9.8	0	1	1	121	85	114	2	0	1	5.19	1
373	44	23.88	419	120	10	0	0	0	108	74	73	2	0	0	0	1
374	28	28.51	339	132	10	0	1	1	106	74	49	2	0	0	3.88	1
375	32	21.5	221	154	12.1	0	1	1	107	71	70	2	0	1	5.02	1
376	37	27.58	160	144	10	0	0	0	131	89	115	2	0	1	0	1
377	38	26.73	152	135	10	0	1	1	140	85	187	2	0	0	5.49	1
378	48	19.82	219	111	9.9	0	0	0	96	63	111	2	0	0	0	1
379	29	20.45	245	107	10	0	1	1	141	101	464	2	0	1	5.88	1
380	48	21.85	90	115	9.3	0	1	1	140	88	63	2	0	1	5.19	1
381	38	29.3	233	155	10.6	0	0	0	103	67	102	2	0	0	0	1
382	59	20.06	239	134	12.2	0	0	0	143	83	92	2	1	1	0	1
383	26	16.6	232	116	10	0	1	1	116	77	56	2	0	1	4.05	1
384	57	28.37	217	139	10.4	0	1	1	139	84	108	2	0	1	6.9	1
385	41	25.63	281	112	9.4	0	0	0	131	82	86	1	0	1	0	1
386	47	29.76	108	145	9.6	0	0	0	140	97	152	4	0	1	0	1
387	63	26.37	146	100	9.8	0	1	1	146	87	261	2	0	1	4.66	1
388	55	22.99	142	111	10	0	0	0	151	101	272	2	1	1	0	1
389	60	29.7	189	141	10.1	0	0	0	116	88	173	4	0	1	0	1
390	71	22.06	218	134	9.8	0	1	1	118	78	96	2	0	1	3.45	1
391	56	30.54	352	133	9.8	0	0	0	119	71	68	2	0	1	0	1
392	52	29.07	153	163	10.7	0	1	1	134	99	119	2	0	1	2.96	1
393	37	20.45	191	141	9.6	0	0	0	116	81	73	2	0	0	0	1
394	37	19.05	208	134	9.5	0	0	0	107	68	158	2	0	0	0	1
395	26	23.74	367	133	10.2	0	1	1	110	75	54	3	0	0	2.92	1
396	50	28.7	211	163	9	0	1	1	149	96	140	2	0	1	4.44	1
397	32	27.66	222	103	9.5	0	0	0	138	87	720	2	0	1	0	1
398	50	24.11	219	145	10	0	1	1	108	73	113	2	0	1	3.22	1
399	53	24.03	145	127	9.2	0	0	0	106	73	76	2	0	0	0	1
400	45	34.85	251	123	11.2	0	0	0	117	71	114	3	0	0	0	1
401	24	26.81	264	139	10.2	0	0	0	102	59	73	2	0	0	0	1
402	56	26.79	247	158	10.7	0	0	0	128	89	123	2	0	0	0	1
403	50	25.6	170	111	9.8	0	0	0	102	73	69	2	0	0	0	1
404	58	28.06	241	98	10.7	1	0	0	143	91	158	3	0	0	6.29	1
405	55	20.32	236	113	10.1	1	0	0	148	85	254	2	0	1	4.2	1
406	60	18.89	235	80	10.6	0	1	1	115	66	385	2	1	1	2.83	1
407	17	21.67	321	109	9.3	1	0	0	114	72	310	2	0	1	3.9	1
408	36	27.47	264	135	12	0	0	0	127	81	157	2	0	0	0	1
409	21	22.86	168	89	10.8	1	1	2	128	86	634	2	0	1	7.45	1
410	55	21.64	260	134	10.2	1	1	1	132	76	78	2	0	1	5.55	1
411	23	22.21	297	116	10.2	0	0	0	132	99	122	2	0	1	0	1
412	66	20.7	178	133	10.1	0	0	0	105	68	150	2	0	0	3.4	1
413	58	24.98	169	93	10.3	0	0	0	117	78	198	3	0	0	5.7	1
414	28	21.43	251	109	9.6	0	0	0	120	91	62	3	0	0	2.61	1
415	17	18.16	228	132	10.5	0	0	0	108	58	58	2	0	0	3.5	1
416	28	24.09	264	113	10.8	0	0	0	135	97	68	2	0	1	4.2	1
417	68	26.67	280	120	9.7	0	0	0	131	71	52	2	0	0	0	1
418	42	26.84	115	118	10.6	0	0	0	119	84	97	2	0	1	3.3	1
419	18	17.25	345	82	11.5	1	0	0	134	91	295	2	0	1	2.7	1
420	20	29.73	293	155	10.5	0	0	0	117	73	101	2	0	0	0	1
421	56	24.33	195	168	11	0	1	1	115	79	101	1	0	1	0	1
422	58	20.76	276	128	11.5	0	0	0	134	91	227	2	0	0	0	1
423	56	23.34	179	136	9.8	1	0	0	103	66	123	3	0	0	3.9	1
424	27	26.17	283	119	11.3	0	0	0	98	64	50	2	0	0	4.9	1
425	49	23.39	189	154	11.1	0	0	0	138	88	99	3	1	1	0	1
426	18	27.58	221	154	11	0	0	0	136	92	67	2	0	0	0	1
427	53	22.49	179	117	11.9	0	0	0	128	87	62	2	0	1	2.8	1
428	39	32.87	255	139	11.2	0	0	0	128	86	64	2	0	0	2.5	1
429	18	30.3	310	160	10	0	0	0	99	74	96	2	0	0	6	1
430	27	19.52	250	102	9.1	1	0	0	106	75	129	2	0	0	5.8	1
431	52	23.8	569	166	11.3	0	0	0	110	80	89	2	0	0	4.6	1
432	55	25.56	88	131	10.4	0	0	0	130	96	184	2	0	1	0	1
433	34	31.14	126	169	11.2	0	1	1	135	61	129	2	0	0	3.7	1
434	22	31.22	167	98	11.2	1	0	0	119	77	72	1	0	0	7.6	1
435	27	29.02	270	181	10.4	0	0	0	108	78	107	2	0	1	3.9	1
436	56	21.08	123	118	9.6	1	1	1	110	66	82	2	0	0	4.5	1
437	71	19.78	228	90	10.2	0	0	0	99	72	108	1	0	0	4	1
438	30	25.08	250	146	10.6	0	0	0	108	85	59	2	0	0	0	1
439	54	21.09	187	113	9.7	1	0	0	102	71	194	2	0	1	4.8	1
440	59	28.58	70	98	9.5	0	0	0	146	91	185	2	0	0	1.47	1
441	40	22.44	114	104	10.9	1	1	1	96	64	57	2	0	0	5.9	1
442	29	20.9	188	127	10.1	1	0	0	103	77	82	2	0	0	4.43	1
443	61	24.61	223	149	9.4	1	1	1	159	100	161	2	0	1	4.7	1
444	43	23.05	172	149	10	0	0	0	97	71	104	2	0	0	0	1
445	26	21.34	231	105	9.7	0	1	1	101	65	74	2	0	0	0	1
446	52	18.83	275	91	10	0	0	0	116	69	403	2	0	1	0	1
447	15	18.56	259	160	9	1	0	0	116	65	145	2	0	0	2.1	1
448	34	24.3	308	135	10	1	0	0	141	101	87	1	0	1	1.3	1
449	39	22.86	225	151	9.5	0	0	0	108	78	87	2	0	0	0	1
450	45	20.56	230	126	9.6	1	1	1	127	88	93	1	0	1	5.3	1
451	34	21.74	265	142	9.1	1	0	0	127	80	103	2	0	1	3.3	1
452	39	22.36	238	151	10	0	0	0	99	69	125	2	1	0	0	1
453	19	18.17	162	110	10	0	0	0	112	75	243	2	0	0	2.3	1
454	55	22.66	169	136	11.3	0	0	0	102	61	127	2	0	0	0	1
455	62	22.72	248	127	11.1	1	1	1	133	82	85	1	0	1	6.9	1
456	51	26.54	245	141	9.6	0	0	0	135	87	101	2	0	0	0	1
457	51	30.47	77	130	11.5	1	0	0	122	88	88	2	0	0	3.3	1
458	42	29.39	263	94	11.9	1	0	0	136	91	90	2	0	1	4.7	1
459	24	26.26	206	161	10.4	1	0	0	124	94	206	2	0	0	4.85	1
460	34	30.74	609	189	11.3	1	0	0	116	77	152	1	0	0	4.48	1
461	37	22.89	188	140	10.5	0	0	0	124	88	126	2	0	1	0	1
462	47	18.87	277	112	9.2	1	0	0	101	70	101	2	0	0	3.49	1
463	31	30.78	190	160	9.7	1	0	0	136	100	224	2	0	1	5.48	1
464	25	18.59	216	135	10.5	1	1	1	139	99	54	1	0	1	3.42	1
465	54	24.77	193	143	10.4	0	0	0	123	91	154	2	0	1	2.82	1
466	35	20.52	198	122	11.1	0	0	0	115	78	49	1	0	0	0	1
467	36	31.64	209	124	11	1	0	0	143	95	62	2	0	1	4.86	1
468	32	20.7	229	116	9.8	0	0	0	96	67	69	1	0	0	4.15	1
469	37	20.55	257	118	9.4	1	1	1	107	66	49	2	0	0	2.7	1
470	28	27.73	242	173	10.2	1	1	1	99	64	92	2	0	0	4.53	1
471	17	41.5	579	149	10.1	0	0	0	115	79	99	2	0	0	0	1
